# Supplementary material
Source: publisher figshare collection journal article supplement (https://future-science-group.figshare.com/articles/dataset/_/23921700)
Supplement: Supplementary file 1 [file 1]

**Table S1.** Preliminary phytochemical tests of aqueous photinia glabra (PG) fruit extract

| Phytoconstituents | Operation | Observation |
| --- | --- | --- |
| Tannins (Braymer’s Test) | 2 mL extract + 2 mL H2O + 2-3 drops FeCl3-H2O (5%) | Blue-black precipitation |
| Flavonoids | 1 mL extract + 1 mL Pb(OAc)4-H2O (10%) | Brown precipitation |
| Terpenoids | 2 mL extract + 2 mL (CH3CO)2O + 3 drops conc. H2SO4 | Deep red-brown coloration |
| Saponins (Foam Test) | 2 mL extract + 2 mL H2O + heat | Foam appeared |
| Steroids (Salkowski Test) | 2 mL extract + 2 mL CHCl3 + 2 mL conc. H2SO4 | Red-brown emulsion |
| Phlobatannis (Precipitate Test) | 2 mL + 2mL HCl-H2O (1%) + heat (60 oC) | Red precipitates formed at the bottom |
| Carbohydrates (Molisch’s Test) | 2 mL extract + 10 mL H2O + 2 drops ethanolic alpha-naphthol (20%) + 2 mL conc. H2SO4 | Reddish violet ring at the junction |
| Glycosides (Liebermann’s Test) | 2 mL extract + 2 mL CHCl3 + 2 mL CH3COOH | No color change |
| Coumarins | 2 mL extract + 3 mL NaOH-H2O (10%) | Dark-yellow coloration |
| Alkaloids (Hager’s Test) | 2 mL extract + few drops of Bi(NO3)3-H2O (10%) | Violet coloration |
| Proteins (Xanthoproteic Test) | 1 mL extract + 1 mL conc. H2SO4 | Red-brown precipitate |
| Anthraquinones (Borntrager’s Test) | 3 mL extract + 3 mL Benzene + 5 mL NH3-H2O (10%) | Light rose coloration in ammonia layer |
| Anthocyanins | 2 mL extract + 2 mL HCl-H2O (2N) + NH3-H2O | Bluish violet coloration |
